# Supplementary material
Source: PubMed Central journal article supplement (PMC6412404)

**Lysm<sup>Cre/+</sup> IKK $\beta$ <sup>f/wt</sup> mT/mG<sup>+/-</sup>**

**DF**

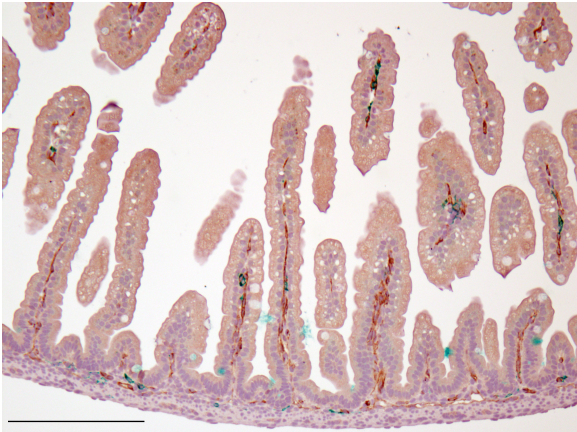

**NEC**

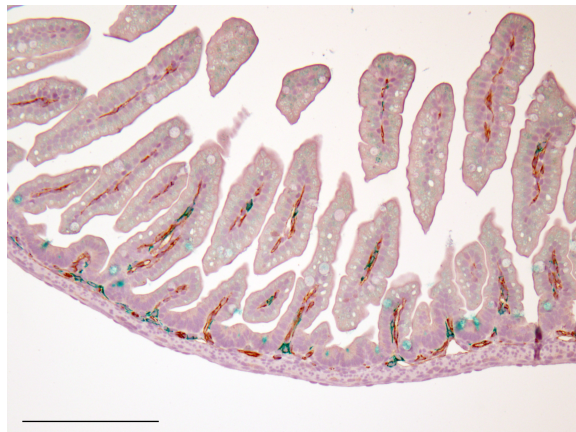

**Lysm<sup>Cre/+</sup> IKK $\beta$ <sup>fl/fl</sup> mT/mG<sup>+/-</sup>**

**DF**

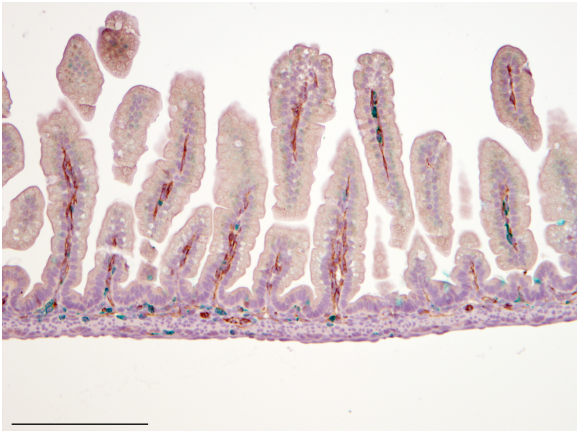

**NEC**

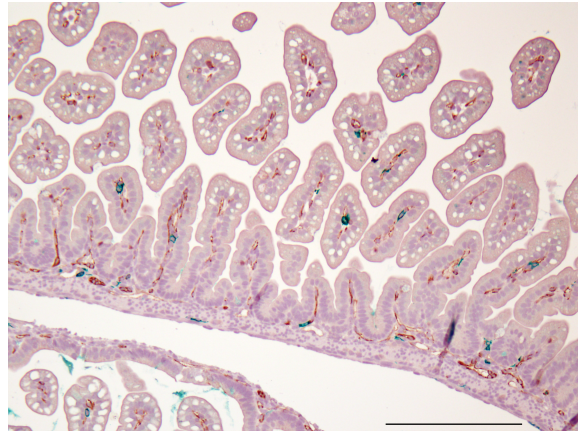

**Cx3cr1<sup>GFP/+</sup>**

**DF**

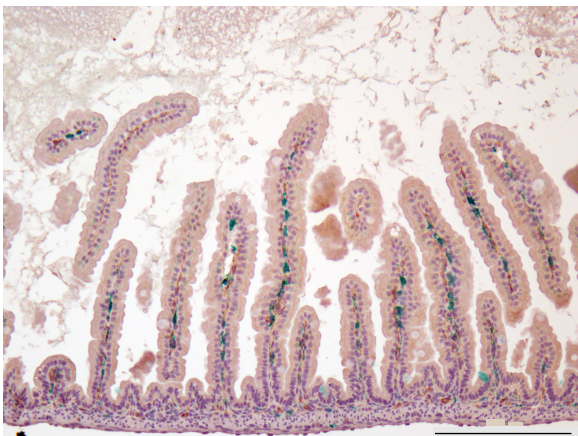

**NEC**

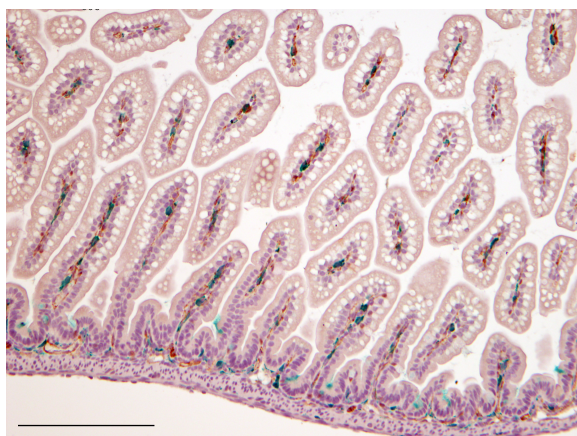

Supplement: mmc2.pdf [file mmc2.pdf]
